# Supplementary material for: Exhaustive 3D-QSAR analyses as a computational tool to explore the potency and selectivity profiles of thieno[3,2-d]pyrimidin-4(3H)-one derivatives as PDE7 inhibitors
Source: Royal Society of Chemistry journal article supplement (doi:10.1039/c6ra12624c), 2016-01-01
Supplement: c6ra12624c1.pdf [file c6ra12624c1.pdf]

**Exhaustive 3D-QSAR analyses as a computational tool to explore the potency and selectivity profiles of thieno[3,2-*d*]pyrimidin-4(3*H*)-one derivatives as PDE7 inhibitors**

Elena Cichero\*, Chiara Brullo, Olga Bruno and Paola Fossa

*Department of Pharmacy, University of Genoa, Viale Benedetto XV n. 3, 16132, Genoa, Italy*

## SUPPORTING INFORMATION

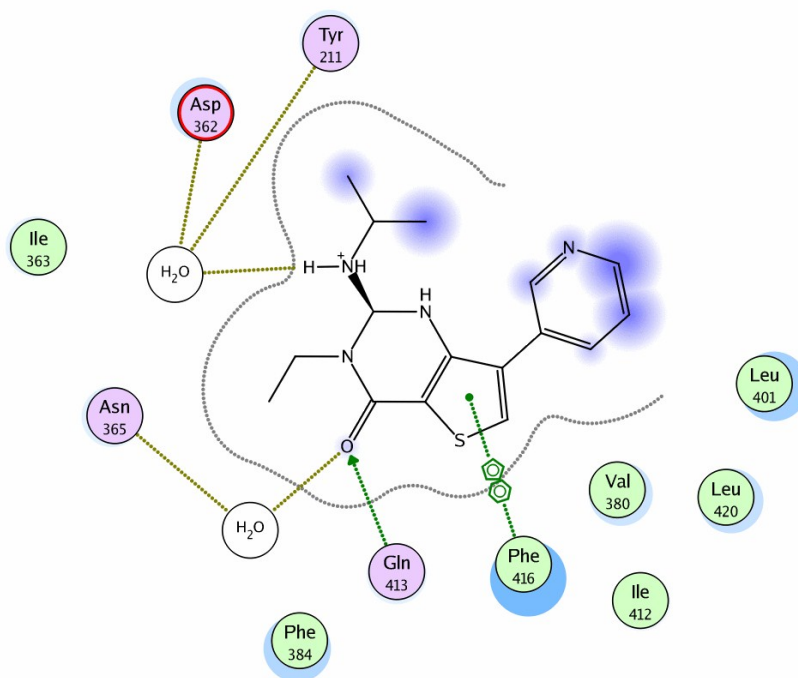

**S1.** Ligplot representation of the binding mode identified at the compound **56**-PDE7A X-ray crystallographic complex.
